# Supplementary material
Source: publisher figshare collection journal article supplement (https://gsapubs.figshare.com/ndownloader/files/26606657)
Supplement: Supplementary file 1 [file 26606657]

Waldien, T.S., Roeske, S.M., Benowitz, J.A., Twelker, E., and Miller, M.S., 2020, Oligocene-Neogene lithospheric-scale reactivation of Mesozoic terrane accretionary structures in the Alaska Range suture zone, southern Alaska, USA: GSA Bulletin, <https://doi.org/10.1130/B35665.1>.

## Supplemental Material

**Supplemental File S1.** Detailed mineral extraction, analytical, data reduction, and data filtering methods used in the LA-ICP-MS analysis.

**Supplemental File S2.** S2 U-Pb data.

**Supplemental File S3.** Detailed  $^{40}\text{Ar}/^{39}\text{Ar}$  analytical methods and summarizes the  $^{40}\text{Ar}/^{39}\text{Ar}$  results, wherein all ages are quoted at the 1 sigma level and calculated using the constants of (Renne et al. (2010)).

**Supplemental File S4:** X-ray maps of reaction textures in ultramafic cumulates.

**Supplemental File S5:** Geochronology plots illustrating the ca. 100 Ma magmatic and metamorphic event.

**Supplemental File S6:** Representative pictures of Cenozoic gravel deposits.

**Supplemental File S7:** Magnetic and resistivity maps of the study area.

**Supplemental File S8.** Electron microprobe data of the spinel group phases.
